# Supplementary material for: An instant beverage rich in nutrients and secondary metabolites manufactured from stems and leaves of Panax notoginseng
Source: Front Nutr. 2022 Dec 7;9:1058639. doi: 10.3389/fnut.2022.1058639 (PMC9767984; doi:10.3389/fnut.2022.1058639)
Supplement: Supplementary file 1 [file Table_1.XLSX]

## Sheet: Sheet1
Table S1 components identified in SLPN by UPLC - MS
No.	Compound	Retention time (min)	Formula	Observed (m/z)	Mass error (mDa)	Mass error (ppm)	Adducts
1	Dencichine	0.66	C5H8N2O5	175.036	-0.3	-1.7	-H
2	Quercetin-3-o-β-D-galactose (2→1) glucoside	2.84	C27H30O17	625.146	-1.4	-0.8	-H
3	Kaempferol-3-o-β-D-galactose (2→1) glucoside	3.18	C27H30O16	609.152	-1.3	-1.1	-H
4	Ginsenoside-La	7.2	C42H72O14	845.489	-1.3	-1.5	+HCOO
5	Floralginsenoside P	9.63	C53H90O23	1139.58	-1.6	-1.4	+HCOO, -H
6	Notoginsenoside D	10.66	C64H108O31	1417.68	-3	-2.1	+HCOO, -H
7	Ginsenoside I (24S or 24R)	11.06	C48H82O20	977.531	-1.9	-2	-H
8	Chikusetsusaponin L5	11.72	C46H78O17	947.519	-2.6	-2.8	+HCOO
9	Notoginsenoside R4	12.16	C59H100O27	1285.64	-2.8	-2.2	+HCOO, -H
10	Notoginsenoside R1	12.54	C47H80O18	977.53	-2.9	-2.9	+HCOO
11	Floralquinquenoside B	12.55	C42H72O15	815.478	-1.8	-2.2	-H
12	Ginsenoside F3	12.81	C41H70O13	815.479	-1.3	-1.5	+HCOO
13	Ginsenoside Ra1	13.35	C58H98O26	1255.63	-3.4	-2.7	+HCOO, -H
14	Malonylginsenoside Ra3	13.7	C62H102O30	1325.63	-3	-2.3	-H
15	M-notoginsenoside R4	13.9	C62H102O30	1325.63	-3.3	-2.5	-H
16	Yesanchinoside J	14.15	C61H102O28	1281.64	-3.4	-2.6	-H
17	Quinquefoloside-Lc	14.28	C54H92O23	1153.6	-3	-2.6	+HCOO, -H
18	Quinquenoside R1	14.57	C56H94O24	1195.61	-4.2	-3.5	+HCOO, -H
19	Notoginsenoside FP2	14.89	C58H98O26	1255.63	-2.7	-2.2	+HCOO, -H
20	Malnoylfloralginsenosides Rb1	15.26	C57H94O26	1193.59	-2.5	-2.1	-H
21	Notoginsenoside Q	15.71	C63H106O30	1387.67	-2.1	-1.5	+HCOO, -H
22	Vinaginsenoside R20	15.92	C48H80O20	975.515	-2	-2.1	-H
23	Notoginsenoside A	16.09	C54H92O24	1123.59	-1.7	-1.5	-H
24	Ginsenoside F1	16.41	C36H62O9	683.438	0	0	+HCOO
25	Chikusetsusaponin FK6	16.62	C53H90O22	1123.59	-1	-0.9	+HCOO, -H
26	Ginsenoside Rs1	17.3	C55H92O23	1119.59	-2.2	-2	-H
27	Malnoylfloralginsenosides Rc1	17.3	C56H92O25	1163.58	-1.7	-1.5	-H
28	Malonylginsenoside Rb2	17.4	C56H92O25	1163.58	-1.8	-1.5	-H
29	Pseudoginsenoside F8	17.68	C55H92O23	1119.6	-0.6	-0.5	-H
30	Notoginsenoside K	18.35	C48H82O18	991.547	-1.2	-1.2	+HCOO, -H
31	Malnoylfloralginsenosides Rd1	18.44	C51H84O21	1031.54	-2.3	-2.2	-H
32	Malnoylfloralginsenosides Re3	18.44	C51H84O21	1031.54	-1.6	-1.5	-H
33	Notoginsenoside P	19.03	C52H88O21	1093.58	-2.3	-2.1	+HCOO, -H
34	Floralginsenoside O	19.42	C53H90O24	1155.57	-8.9	-7.7	+HCOO
35	Malnoylfloralginsenosides Rd6	19.57	C54H86O24	1117.54	-1.3	-1.1	-H
36	Quinquefoloside Lb	19.85	C53H88O22	1075.57	-1.9	-1.8	-H
37	Notoginsenoside R6	19.95	C48H82O19	961.535	-2.8	-2.9	-H
38	Notoginsenoside Fe	20.71	C47H80O17	961.536	-1.5	-1.5	+HCOO, -H
39	Ginsenoside Rb1	20.71	C54H92O23	1107.59	-1.7	-1.5	-H
40	Ginsenoside F2	22.4	C42H72O13	829.495	-0.7	-0.9	+HCOO
41	Notoginsenoside ST - 2	22.5	C43H74O15	829.495	-0.6	-0.8	-H
42	Ginsenoside Rs3	22.72	C44H74O14	871.505	-1.2	-1.4	+HCOO, -H
43	Ginsenoside Rs4	23.32	C44H72O14	869.49	-0.9	-1	+HCOO
44	24(R) - Pseudoginsenoside F11	23.72	C42H72O14	799.485	-0.4	-0.5	-H
45	Gypenoside XIII	24.61	C41H70O12	799.485	-0.3	-0.3	+HCOO, -H
46	24(R) - Vinaginsenoside R1	25	C44H74O15	841.494	-1.3	-1.5	-H
